# Supplementary material for: Alzheimer Disease: Recent Updates on Apolipoprotein E and Gut Microbiome Mediation of Oxidative Stress, and Prospective Interventional Agents
Source: PubMed Central journal article supplement (PMC8782546; doi:10.14336/ad.2021.0616), 2022-02-01
Supplement: AD-13-1-87-s.pdf [file AD-13-1-87-s.pdf]

## SUPPLEMENTARY DATA

# **Alzheimer Disease: Recent Updates on Apolipoprotein E and Gut Microbiome Mediation of Oxidative Stress, and Prospective Interventional Agents**

**Benson OA. Botchway<sup>1,2,5</sup>, Favour C. Okoye<sup>2</sup>, Yili Chen<sup>3\*</sup>, William E. Arthur<sup>4</sup>, Marong Fang<sup>1,5\*</sup>**

# SUPPLEMENTARY DATA

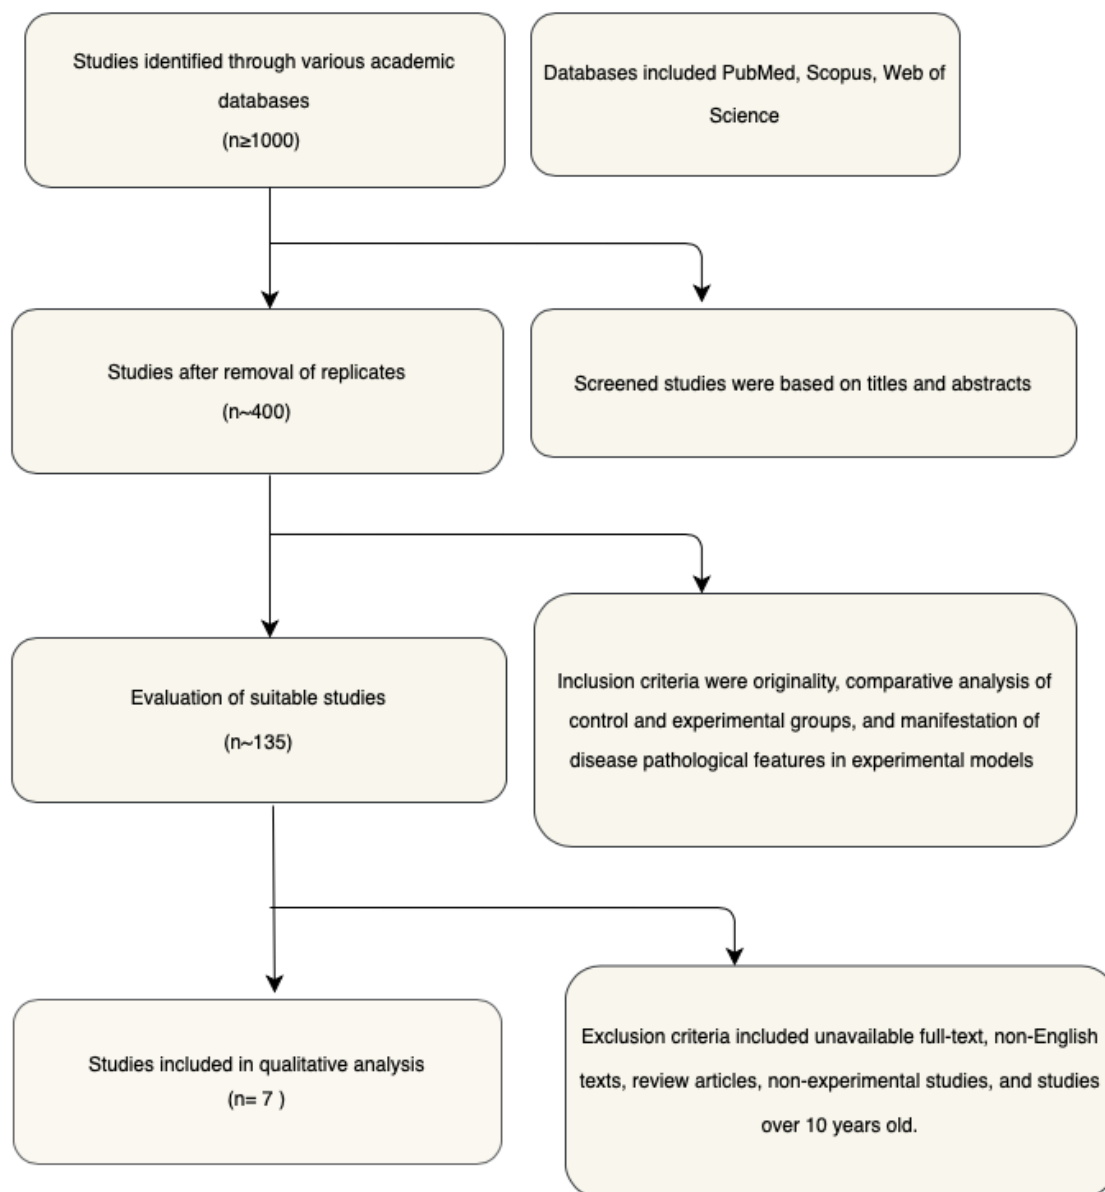

**Supplementary Figure 1. Flowchart for inclusion of studies examining apolipoprotein E and gut microbiome modulations of oxidative stress in Alzheimer's disease.**
